# Supplementary material for: Intensity and Duration of Vibration Emissions during Shipping as Interacting Factors on the Quality of Boar Semen Extended in Beltsville Thawing Solution
Source: MDPI journal article supplement (doi:10.3390/ani13050952), 2023-03-06
Supplement: s1 [file s1]

**Table S1.** Summary of total sperm motility data collected on day 1 after treatment.

| Duration | D <sub>i</sub> = 0.5 |            | D <sub>i</sub> = 1.0 |            | D <sub>i</sub> = 1.5 |            | D <sub>i</sub> = 2.0 |             | D <sub>i</sub> = 3.0 |             | D <sub>i</sub> = 4.0 |             | D <sub>i</sub> = 5.0 |             | D <sub>i</sub> = 6.0 |             |
|----------|----------------------|------------|----------------------|------------|----------------------|------------|----------------------|-------------|----------------------|-------------|----------------------|-------------|----------------------|-------------|----------------------|-------------|
|          | TSM                  | Δ-TSM      | TSM                  | Δ-TSM      | TSM                  | Δ-TSM      | TSM                  | Δ-TSM       | TSM                  | Δ-TSM       | TSM                  | Δ-TSM       | TSM                  | Δ-TSM       | TSM                  | Δ-TSM       |
| 0.0      | 77.3 ± 4.1           | 0          | 84.3 ± 4.4           | 0          | 82.6 ± 3.8           | 0          | 80 ± 7.4             | 0           | 81.7 ± 3.8           | 0           | 78.9 ± 10.3          | 0           | 77.2 ± 5.2           | 0           | 80.6 ± 4.7           | 0           |
| 0.5      | 75.3 ± 7.7           | -2 ± 2.1   | 82.8 ± 6.4           | -1.5 ± 1.8 | 79.2 ± 6.5           | -3.4 ± 1.3 | 77.5 ± 6.2           | -2.5 ± 1    | 82.8 ± 3.7           | 1.1 ± 1.7   | 78.5 ± 8.2           | -0.4 ± 1.1  | 77.7 ± 4.9           | 0.5 ± 0.4   | 78 ± 5.7             | -2.6 ± 1.9  |
| 1.0      | 76.5 ± 5.3           | -0.8 ± 0.8 | 82.6 ± 4.4           | -1.7 ± 0.3 | 79.8 ± 6.1           | -2.8 ± 1.3 | 72.8 ± 10.4          | -7.2 ± 2.3  | 79.3 ± 6.9           | -2.4 ± 2    | 76.9 ± 9.7           | -2 ± 0.7    | 77.1 ± 3.4           | -0.1 ± 1.8  | 77.4 ± 2.6           | -3.2 ± 1.8  |
| 2.0      | 75.1 ± 5.1           | -2.2 ± 0.8 | 79.5 ± 8             | -4.7 ± 2.1 | 79.9 ± 6.5           | -2.7 ± 1.4 | 73.5 ± 6.9           | -6.4 ± 1.6  | 74.6 ± 7.6           | -7.1 ± 2.6  | 75.6 ± 9.7           | -3.3 ± 1.4  | 74.3 ± 2.7           | -2.9 ± 1.4  | 78.3 ± 3.1           | -2.3 ± 2.4  |
| 3.0      | 75.5 ± 3.3           | -1.8 ± 0.6 | 80.4 ± 5.1           | -3.9 ± 1.5 | 78.3 ± 7.8           | -4.4 ± 2.3 | 73.4 ± 8.1           | -6.6 ± 2.4  | 78.7 ± 5.4           | -3 ± 2      | 73.4 ± 9.4           | -5.5 ± 1.6  | 76.7 ± 3.8           | -0.4 ± 2.7  | 75.5 ± 5.2           | -5.1 ± 1.3  |
| 4.0      | 74.5 ± 5.3           | -2.8 ± 0.7 | 81.5 ± 3.7           | -2.8 ± 0.7 | 80.4 ± 6.9           | -2.3 ± 1.4 | 71.9 ± 6.3           | -8 ± 1.4    | 78.2 ± 6.8           | -3.5 ± 2.6  | 74.3 ± 8.4           | -4.6 ± 1.2  | 73.3 ± 3.6           | -3.9 ± 2.4  | 73.9 ± 5             | -6.7 ± 1.4  |
| 5.0      | 74.3 ± 4.7           | -2.9 ± 0.3 | 79.4 ± 4             | -4.8 ± 2.7 | 74 ± 11              | -8.6 ± 3.2 | 68.2 ± 5.9           | -11.8 ± 1.9 | 76.8 ± 7.1           | -4.9 ± 2.6  | 74.4 ± 7.9           | -4.6 ± 1.7  | 74.4 ± 4.5           | -2.8 ± 0.8  | 71.6 ± 8.2           | -9 ± 3.3    |
| 6.0      | 75.5 ± 3.5           | -1.8 ± 0.4 | 74.3 ± 5.9           | -10 ± 1.2  | 74 ± 9.4             | -8.7 ± 2.6 | 69.1 ± 3.3           | -10.9 ± 3.4 | 75.9 ± 5.3           | -5.8 ± 1.4  | 71.3 ± 10.6          | -7.6 ± 1.5  | 74 ± 4.5             | -3.2 ± 2.4  | 73.7 ± 2.9           | -6.8 ± 2.4  |
| 7.0      | 77.1 ± 3.2           | -0.2 ± 1.9 | 75.6 ± 8.2           | -8.7 ± 2.4 | 74.9 ± 9.7           | -7.7 ± 2.7 | 68.9 ± 11.9          | -11.1 ± 2.1 | 75.4 ± 4.6           | -6.2 ± 1.4  | 73.6 ± 8.2           | -5.3 ± 1    | 72.3 ± 4.8           | -4.8 ± 2.2  | 73.6 ± 7.2           | -7 ± 2.6    |
| 8.0      | 77.9 ± 6.4           | 0.6 ± 1.5  | 79.5 ± 4.7           | -4.8 ± 1   | 75.4 ± 7.7           | -7.2 ± 1.9 | 67.9 ± 9.8           | -12.1 ± 3.9 | 73.3 ± 5.4           | -8.4 ± 2    | 71.9 ± 9.5           | -7 ± 1.9    | 73.3 ± 6.8           | -3.9 ± 2.2  | 70.4 ± 4.6           | -10.2 ± 1.1 |
| 9.0      | 75.8 ± 4.2           | -1.5 ± 2.1 | 77.9 ± 4.3           | -6.3 ± 0.3 | 75.6 ± 8.2           | -7 ± 2.4   | 71.8 ± 5             | -8.2 ± 1.4  | 74.7 ± 4.5           | -7 ± 1.2    | 68.2 ± 13.5          | -10.7 ± 4.9 | 72.4 ± 6             | -4.8 ± 0.6  | 73.1 ± 6.8           | -7.5 ± 1.9  |
| 10.0     | 79.2 ± 4.3           | 1.9 ± 1.3  | 77.7 ± 5.3           | -6.5 ± 1.8 | 73.3 ± 7.5           | -9.3 ± 2.4 | 70.7 ± 5.9           | -9.3 ± 2.1  | 70.9 ± 8.4           | -10.7 ± 2.9 | 67 ± 6.8             | -11.9 ± 2.5 | 69.2 ± 3.9           | -8 ± 3.7    | 65.5 ± 3.6           | -15.1 ± 1.5 |
| 11.0     | 76.1 ± 5.3           | -1.2 ± 0.9 | 77.6 ± 5             | -6.7 ± 0.7 | 75.3 ± 7.6           | -7.3 ± 1.8 | 67.7 ± 7.5           | -12.2 ± 5   | 63.8 ± 9.6           | -17.9 ± 3.1 | 66.8 ± 9.4           | -12.1 ± 1.7 | 68.5 ± 7.4           | -8.7 ± 3.4  | 66.3 ± 7             | -14.2 ± 2.3 |
| 12.0     | 74 ± 3.3             | -3.2 ± 0.9 | 72.3 ± 5.2           | -12 ± 0.5  | 74.5 ± 8             | -8.1 ± 2.2 | 67.6 ± 6.3           | -12.4 ± 1.7 | 69.3 ± 7.9           | -12.4 ± 2.1 | 66.4 ± 12.8          | -12.5 ± 2.7 | 62 ± 3.5             | -15.2 ± 2.2 | 67.7 ± 11.7          | -12.9 ± 3.8 |

TSM – total sperm motility (%), means ± SD), Δ-TSM - difference to unshaken control group (%), means ± SE), Duration (h).

**Table S2.** Summary of total sperm motility data collected on day 2 after treatment.

|                 | <b>D<sub>i</sub> = 0.5</b> |              | <b>D<sub>i</sub> = 1.0</b> |              | <b>D<sub>i</sub> = 1.5</b> |              | <b>D<sub>i</sub> = 2.0</b> |              | <b>D<sub>i</sub> = 3.0</b> |              | <b>D<sub>i</sub> = 4.0</b> |              | <b>D<sub>i</sub> = 5.0</b> |              | <b>D<sub>i</sub> = 6.0</b> |              |
|-----------------|----------------------------|--------------|----------------------------|--------------|----------------------------|--------------|----------------------------|--------------|----------------------------|--------------|----------------------------|--------------|----------------------------|--------------|----------------------------|--------------|
| <b>Duration</b> | <b>TSM</b>                 | <b>Δ-TSM</b> |
| 0.0             | 79.6 ± 6.1                 | 0            | 79.8 ± 3.5                 | 0            | 78.5 ± 6.1                 | 0            | 77.1 ± 8.1                 | 0            | 81.4 ± 5.8                 | 0            | 76.2 ± 8.9                 | 0            | 73.7 ± 2.3                 | 0            | 78.6 ± 5.8                 | 0            |
| 0.5             | 78.3 ± 4.5                 | -1.3 ± 1.2   | 83.9 ± 4.5                 | 4.1 ± 2.2    | 80.5 ± 7                   | 2 ± 1.1      | 75.5 ± 9.9                 | -1.6 ± 2.1   | 82.6 ± 4.3                 | 1.2 ± 1.1    | 76.8 ± 10.1                | 0.6 ± 1      | 75 ± 4.1                   | 1.3 ± 2.3    | 76.9 ± 5                   | -1.7 ± 1     |
| 1.0             | 79.8 ± 5.3                 | 0.2 ± 0.8    | 81.4 ± 2.9                 | 1.6 ± 0.5    | 77.6 ± 7.7                 | -0.9 ± 1.7   | 74.2 ± 6.9                 | -2.9 ± 2.6   | 80.6 ± 6.3                 | -0.8 ± 1.9   | 77.7 ± 8.1                 | 1.5 ± 1.1    | 79.1 ± 4.9                 | 5.5 ± 3.9    | 77.4 ± 3.3                 | -1.2 ± 2.8   |
| 2.0             | 76.7 ± 5.7                 | -2.9 ± 0.6   | 81.8 ± 4.8                 | 2 ± 2.8      | 81.3 ± 5                   | 2.8 ± 1.2    | 75.9 ± 7.3                 | -1.2 ± 1.2   | 79.9 ± 5.4                 | -1.5 ± 2.7   | 75.9 ± 8.4                 | -0.4 ± 1     | 70 ± 2.4                   | -3.7 ± 1.9   | 76.1 ± 5.5                 | -2.5 ± 1.1   |
| 3.0             | 75.5 ± 6.3                 | -4.1 ± 0.6   | 82.9 ± 3.2                 | 3.1 ± 0.6    | 78.5 ± 7.1                 | 0 ± 1.5      | 75.6 ± 4.2                 | -1.5 ± 2.2   | 77.9 ± 7.1                 | -3.5 ± 2.5   | 74.4 ± 8.2                 | -1.9 ± 0.6   | 70.9 ± 2.6                 | -2.8 ± 1.4   | 73.8 ± 8.3                 | -4.8 ± 1.3   |
| 4.0             | 75.4 ± 10                  | -4.2 ± 2.9   | 81.7 ± 4.5                 | 1.9 ± 2.6    | 78.8 ± 4.4                 | 0.4 ± 1.4    | 73 ± 4.1                   | -4.1 ± 2.5   | 76 ± 6                     | -5.4 ± 2.1   | 74 ± 9.1                   | -2.3 ± 0.8   | 70.4 ± 5.1                 | -3.3 ± 3.6   | 71.2 ± 7.3                 | -7.4 ± 2.7   |
| 5.0             | 75.2 ± 5.3                 | -4.4 ± 0.8   | 80.7 ± 6.3                 | 0.9 ± 2.7    | 75.6 ± 10.1                | -2.9 ± 1.9   | 70.5 ± 4.1                 | -6.6 ± 1.9   | 78.2 ± 5.5                 | -3.2 ± 1.2   | 73.3 ± 8.8                 | -2.9 ± 1.4   | 73.8 ± 4.5                 | 0.1 ± 3.3    | 71.6 ± 7.5                 | -7.1 ± 1.7   |
| 6.0             | 75.7 ± 6.2                 | -4 ± 2       | 76.4 ± 5.1                 | -3.4 ± 2.6   | 75.4 ± 8.2                 | -3.1 ± 2.4   | 69.6 ± 6                   | -7.4 ± 2.4   | 79.5 ± 4                   | -1.9 ± 1.2   | 71.2 ± 9.1                 | -5.1 ± 1.2   | 71.9 ± 9.4                 | -1.7 ± 6     | 69.2 ± 3                   | -9.4 ± 1.6   |
| 7.0             | 76.9 ± 1.8                 | -2.8 ± 2.9   | 80.7 ± 3.9                 | 0.9 ± 2.3    | 75.9 ± 9.9                 | -2.6 ± 1.9   | 73.8 ± 8.5                 | -3.2 ± 2.8   | 74.6 ± 5.6                 | -6.8 ± 1.7   | 73.8 ± 7.4                 | -2.4 ± 1     | 72.8 ± 4.6                 | -0.9 ± 3.9   | 69.7 ± 5.7                 | -8.9 ± 1.4   |
| 8.0             | 75.9 ± 5.9                 | -3.7 ± 2     | 79.2 ± 6.8                 | -0.6 ± 2.6   | 74.4 ± 7.9                 | -4 ± 1.3     | 72 ± 4.5                   | -5 ± 3.2     | 72.4 ± 7.3                 | -9 ± 1.9     | 70.3 ± 8.1                 | -6 ± 1.1     | 69.6 ± 7                   | -4 ± 4.1     | 69.8 ± 3.1                 | -8.8 ± 2.9   |
| 9.0             | 74.8 ± 8.1                 | -4.8 ± 2.8   | 79.4 ± 3.9                 | -0.4 ± 1.7   | 73.8 ± 9.4                 | -4.7 ± 2.2   | 74.4 ± 8.9                 | -2.7 ± 2.3   | 72.6 ± 5.3                 | -8.8 ± 1.5   | 71.6 ± 8.7                 | -4.7 ± 1.1   | 71.5 ± 6.7                 | -2.2 ± 5.1   | 67.9 ± 5.4                 | -10.7 ± 1.3  |
| 10.0            | 73.2 ± 3.7                 | -6.5 ± 1.5   | 77.8 ± 6.8                 | -2 ± 3.9     | 71.3 ± 7.1                 | -7.2 ± 2.4   | 70.5 ± 6                   | -6.6 ± 2.7   | 72 ± 6.7                   | -9.4 ± 1.7   | 68.9 ± 7.5                 | -7.3 ± 1.7   | 70.6 ± 6.4                 | -3.1 ± 4.9   | 65.4 ± 8.6                 | -13.2 ± 1.6  |
| 11.0            | 75.1 ± 7.3                 | -4.5 ± 2.6   | 78.5 ± 6.2                 | -1.3 ± 1.6   | 74.1 ± 8.1                 | -4.4 ± 1.7   | 68.7 ± 8.4                 | -8.4 ± 4.4   | 64.6 ± 5.5                 | -16.8 ± 2.6  | 70.8 ± 9.5                 | -5.4 ± 1.5   | 64.3 ± 7.7                 | -9.3 ± 3.6   | 63.1 ± 11.7                | -15.5 ± 3.2  |
| 12.0            | 76 ± 7.1                   | -3.7 ± 0.6   | 75.3 ± 8.6                 | -4.5 ± 3.5   | 74.6 ± 7.9                 | -3.9 ± 2.1   | 64.9 ± 4.4                 | -12.2 ± 4.3  | 66.9 ± 6.8                 | -14.5 ± 4.1  | 64.9 ± 9.5                 | -11.3 ± 1.6  | 66.9 ± 6.1                 | -6.8 ± 2.2   | 62.6 ± 14.9                | -16 ± 4.2    |

TSM – total sperm motility (%), means ± SD), Δ-TSM - difference to unshaken control group (%), means ± SE), Duration (h).

**Table S3.** Summary of total sperm motility data collected on day 3 after treatment.

|                 | <b>D<sub>i</sub> = 0.5</b> |               | <b>D<sub>i</sub> = 1.0</b> |                | <b>D<sub>i</sub> = 1.5</b> |               | <b>D<sub>i</sub> = 2.0</b> |                | <b>D<sub>i</sub> = 3.0</b> |                | <b>D<sub>i</sub> = 4.0</b> |                | <b>D<sub>i</sub> = 5.0</b> |                | <b>D<sub>i</sub> = 6.0</b> |                |
|-----------------|----------------------------|---------------|----------------------------|----------------|----------------------------|---------------|----------------------------|----------------|----------------------------|----------------|----------------------------|----------------|----------------------------|----------------|----------------------------|----------------|
| <b>Duration</b> | <b>TSM</b>                 | <b>Δ-TSM</b>  | <b>TSM</b>                 | <b>Δ-TSM</b>   | <b>TSM</b>                 | <b>Δ-TSM</b>  | <b>TSM</b>                 | <b>Δ-TSM</b>   | <b>TSM</b>                 | <b>Δ-TSM</b>   | <b>TSM</b>                 | <b>Δ-TSM</b>   | <b>TSM</b>                 | <b>Δ-TSM</b>   | <b>TSM</b>                 | <b>Δ-TSM</b>   |
| 0.0             | 79.3 ±<br>6.1              | 0             | 79 ±<br>4.8                | 0              | 79.2 ±<br>7.6              | 0             | 77.3 ±<br>9.2              | 0              | 83.4 ±<br>2.8              | 0              | 75 ±<br>9.2                | 0              | 75.8 ±<br>6.1              | 0              | 79.6 ±<br>5.6              | 0              |
| 0.5             | 79.6 ±<br>6.5              | 0.4 ±<br>1.4  | 78.1 ±<br>3.5              | -0.9 ±<br>3.3  | 78.7 ±<br>7                | -0.5 ±<br>1.3 | 76.2 ±<br>6.2              | -1 ±<br>1.4    | 78.3 ±<br>6.8              | -5.2 ±<br>2    | 74.5 ±<br>10.7             | -0.4 ±<br>1.6  | 78.9 ±<br>6.8              | 3.1 ±<br>0.6   | 77.3 ±<br>5.2              | -2.3 ±<br>1.5  |
| 1.0             | 79.5 ±<br>2                | 0.3 ±<br>2.6  | 79.7 ±<br>6.1              | 0.7 ±<br>2     | 78 ±<br>9.1                | -1.2 ±<br>1.1 | 76.6 ±<br>7.3              | -0.7 ±<br>1.7  | 78 ±<br>4.5                | -5.5 ±<br>1.1  | 74.8 ±<br>9.1              | -0.2 ±<br>0.8  | 77 ±<br>4.4                | 1.2 ±<br>1     | 75.2 ±<br>7.5              | -4.4 ±<br>1.8  |
| 2.0             | 76.3 ±<br>8.5              | -3 ±<br>2.2   | 76.7 ±<br>4.6              | -2.3 ±<br>3.7  | 78.4 ±<br>6.1              | -0.8 ±<br>1.1 | 75.5 ±<br>6.9              | -1.8 ±<br>1.9  | 77.8 ±<br>6                | -5.6 ±<br>1.7  | 72.8 ±<br>9.3              | -2.2 ±<br>1.7  | 77.9 ±<br>6.6              | 2.1 ±<br>4.5   | 73.4 ±<br>10.9             | -6.2 ±<br>3.8  |
| 3.0             | 76.8 ±<br>7.5              | -2.5 ±<br>0.9 | 79.8 ±<br>6.2              | 0.9 ±<br>1.7   | 75.4 ±<br>9.4              | -3.8 ±<br>1.2 | 73.6 ±<br>5.8              | -3.7 ±<br>1.8  | 75.9 ±<br>3.8              | -7.5 ±<br>0.7  | 72.9 ±<br>10.6             | -2.1 ±<br>1.2  | 75.9 ±<br>3.2              | 0.1 ±<br>2.8   | 69.5 ±<br>7.5              | -10.1 ±<br>2.8 |
| 4.0             | 75.9 ±<br>5.9              | -3.3 ±<br>0.6 | 83.9 ±<br>2.6              | 4.9 ±<br>1.6   | 75.2 ±<br>10               | -4 ±<br>1.5   | 71.2 ±<br>5.7              | -6 ±<br>1.7    | 75.4 ±<br>5.5              | -8 ±<br>1.8    | 70.8 ±<br>11.7             | -4.2 ±<br>1.7  | 69.1 ±<br>5.2              | -6.6 ±<br>4.4  | 69.2 ±<br>13.1             | -10.4 ±<br>4.2 |
| 5.0             | 76.5 ±<br>7                | -2.8 ±<br>1.8 | 79.8 ±<br>4                | 0.8 ±<br>0.5   | 73.1 ±<br>12.7             | -6.1 ±<br>3.5 | 71.6 ±<br>4.4              | -5.7 ±<br>2.4  | 77.7 ±<br>6                | -5.7 ±<br>1.9  | 74.3 ±<br>11.6             | -0.7 ±<br>2.2  | 73.2 ±<br>3.5              | -2.5 ±<br>2.9  | 71.1 ±<br>9.5              | -8.6 ±<br>3.5  |
| 6.0             | 75.8 ±<br>6.3              | -3.4 ±<br>2   | 77.4 ±<br>7.3              | -1.6 ±<br>1.7  | 73.2 ±<br>9.6              | -6 ±<br>1.7   | 71 ±<br>7.7                | -6.2 ±<br>2.4  | 75.6 ±<br>7.1              | -7.8 ±<br>2.2  | 69.1 ±<br>12.3             | -5.9 ±<br>2.5  | 68.6 ±<br>6.4              | -7.1 ±<br>2.2  | 69.6 ±<br>5.8              | -10 ±<br>2.8   |
| 7.0             | 73.9 ±<br>6                | -5.4 ±<br>0.1 | 78.8 ±<br>3.6              | -0.1 ±<br>2.2  | 75.1 ±<br>9.4              | -4.1 ±<br>2.5 | 70.2 ±<br>9.6              | -7.1 ±<br>2.7  | 74.8 ±<br>6                | -8.6 ±<br>2.2  | 69.9 ±<br>9.9              | -5.1 ±<br>1.8  | 76.2 ±<br>6.2              | 0.5 ±<br>1     | 64.1 ±<br>9.7              | -15.5 ±<br>3.4 |
| 8.0             | 69.8 ±<br>3.9              | -9.5 ±<br>3.5 | 76.2 ±<br>5.8              | -2.8 ±<br>3.6  | 75.9 ±<br>10.1             | -3.3 ±<br>1.3 | 69.2 ±<br>7.6              | -8.1 ±<br>2.3  | 73 ±<br>7.1                | -10.4 ±<br>2.2 | 69.2 ±<br>11.1             | -5.8 ±<br>2    | 71.8 ±<br>5.7              | -3.9 ±<br>0.2  | 67.7 ±<br>5.3              | -11.9 ±<br>2.2 |
| 9.0             | 76.7 ±<br>7.5              | -2.6 ±<br>1.1 | 76.7 ±<br>5.4              | -2.3 ±<br>3.1  | 73.7 ±<br>9.2              | -5.5 ±<br>1   | 71.3 ±<br>7.1              | -5.9 ±<br>2.3  | 75.1 ±<br>2.8              | -8.3 ±<br>0.9  | 68.9 ±<br>9.5              | -6.1 ±<br>1.9  | 73.2 ±<br>5.5              | -2.5 ±<br>1.7  | 65 ±<br>10.8               | -14.6 ±<br>3.9 |
| 10.0            | 75.1 ±<br>2.6              | -4.2 ±<br>3.7 | 76.3 ±<br>8.6              | -2.7 ±<br>2.4  | 72.9 ±<br>5.9              | -6.3 ±<br>1.5 | 71.7 ±<br>7.2              | -5.5 ±<br>2.2  | 72.7 ±<br>7.7              | -10.7 ±<br>2.4 | 67.6 ±<br>10.6             | -7.4 ±<br>2.1  | 67.2 ±<br>4.9              | -8.5 ±<br>1.4  | 61.1 ±<br>12.4             | -18.5 ±<br>4.9 |
| 11.0            | 73.1 ±<br>5.3              | -6.1 ±<br>1.4 | 76.4 ±<br>5.4              | -2.6 ±<br>3    | 73.6 ±<br>9.3              | -5.6 ±<br>1   | 66.7 ±<br>7.2              | -10.6 ±<br>3.3 | 59.9 ±<br>9.1              | -23.6 ±<br>3.8 | 63.1 ±<br>10.9             | -11.9 ±<br>2.7 | 64.6 ±<br>7.1              | -11.1 ±<br>4.2 | 61.8 ±<br>15.8             | -17.9 ±<br>5.4 |
| 12.0            | 73.3 ±<br>3.8              | -5.9 ±<br>1.5 | 68.6 ±<br>4.9              | -10.4 ±<br>1.4 | 72.7 ±<br>11               | -6.5 ±<br>2.3 | 65.1 ±<br>6.1              | -12.1 ±<br>2.5 | 68.4 ±<br>9                | -15 ±<br>3.4   | 62.2 ±<br>12               | -12.8 ±<br>2.4 | 62.3 ±<br>4.9              | -13.4 ±<br>5   | 60.7 ±<br>15.6             | -19 ±<br>5.1   |

TSM – total sperm motility (%), means ± SD), Δ-TSM - difference to unshaken control group (%), means ± SE), Duration (h).

**Table S4.** Summary of total sperm motility data collected on day 4 after treatment.

|          | D <sub>i</sub> = 0.5 |               | D <sub>i</sub> = 1.0 |               | D <sub>i</sub> = 1.5 |               | D <sub>i</sub> = 2.0 |                | D <sub>i</sub> = 3.0 |                | D <sub>i</sub> = 4.0 |                | D <sub>i</sub> = 5.0 |                | D <sub>i</sub> = 6.0 |                |
|----------|----------------------|---------------|----------------------|---------------|----------------------|---------------|----------------------|----------------|----------------------|----------------|----------------------|----------------|----------------------|----------------|----------------------|----------------|
| Duration | TSM                  | Δ-TSM         | TSM                  | Δ-TSM         | TSM                  | Δ-TSM         | TSM                  | Δ-TSM          | TSM                  | Δ-TSM          | TSM                  | Δ-TSM          | TSM                  | Δ-TSM          | TSM                  | Δ-TSM          |
| 0.0      | 75.5 ±<br>3.7        | 0             | 80.7 ±<br>6.5        | 0             | 78.4 ±<br>6.9        | 0             | 74.2 ±<br>9.4        | 0              | 79.4 ±<br>4.2        | 0              | 75.9 ±<br>7.8        | 0              | 79.3 ±<br>5.8        | 0              | 77.1 ±<br>6.9        | 0              |
| 0.5      | 75.8 ±<br>3.2        | 0.4 ±<br>0.3  | 81.1 ±<br>5          | 0.4 ±<br>0.9  | 78.8 ±<br>9.3        | 0.4 ±<br>1.8  | 74.6 ±<br>8.9        | 0.5 ±<br>1.8   | 79.9 ±<br>6.4        | 0.4 ±<br>1.9   | 75.8 ±<br>8.8        | -0.1 ±<br>1.2  | 74.4 ±<br>5          | -4.9 ±<br>1.3  | 75 ±<br>8.4          | -2.1 ±<br>1.2  |
| 1.0      | 73.9 ±<br>4.2        | -1.5 ±<br>0.3 | 81.2 ±<br>6.8        | 0.5 ±<br>0.2  | 77.3 ±<br>7.2        | -1.1 ±<br>2.2 | 73.4 ±<br>6.9        | -0.8 ±<br>1.6  | 78.4 ±<br>7.9        | -1 ±<br>2.1    | 77.1 ±<br>7.2        | 1.2 ±<br>1.3   | 76.1 ±<br>6.9        | -3.2 ±<br>0.6  | 75.7 ±<br>6.7        | -1.3 ±<br>2.3  |
| 2.0      | 74.8 ±<br>5.3        | -0.7 ±<br>1.4 | 78.9 ±<br>4.2        | -1.8 ±<br>1.4 | 75 ±<br>6.5          | -3.4 ±<br>2.2 | 74.5 ±<br>5.4        | 0.4 ±<br>2     | 76.4 ±<br>6          | -3 ±<br>1.4    | 72.7 ±<br>8.2        | -3.2 ±<br>0.8  | 72.9 ±<br>5.9        | -6.4 ±<br>1.6  | 73.5 ±<br>8.4        | -3.6 ±<br>1.6  |
| 3.0      | 78 ±<br>7.6          | 2.5 ±<br>2.5  | 82.2 ±<br>6          | 1.5 ±<br>1.6  | 78.1 ±<br>7.2        | -0.3 ±<br>0.8 | 72.5 ±<br>6.1        | -1.7 ±<br>2.2  | 74 ±<br>8.8          | -5.4 ±<br>2.2  | 72.9 ±<br>6.9        | -3 ±<br>0.9    | 78 ±<br>9.4          | -1.3 ±<br>2.1  | 70.9 ±<br>10.4       | -6.2 ±<br>3    |
| 4.0      | 72.9 ±<br>4.1        | -2.5 ±<br>0.5 | 79.7 ±<br>6.8        | -1 ±<br>2.4   | 75.1 ±<br>8.1        | -3.3 ±<br>2.8 | 68.4 ±<br>6          | -5.7 ±<br>3    | 72.6 ±<br>8.9        | -6.8 ±<br>3.4  | 73.3 ±<br>7.8        | -2.6 ±<br>0.7  | 71.8 ±<br>5.6        | -7.4 ±<br>0.2  | 70.4 ±<br>10.8       | -6.7 ±<br>2.7  |
| 5.0      | 76.4 ±<br>7.5        | 1 ±<br>2.3    | 79 ±<br>5.3          | -1.7 ±<br>1.2 | 77 ±<br>7            | -1.4 ±<br>1.2 | 71.2 ±<br>4.8        | -3 ±<br>2.3    | 74.4 ±<br>6.9        | -5 ±<br>2.2    | 73.6 ±<br>7.1        | -2.3 ±<br>0.5  | 73 ±<br>7.6          | -6.3 ±<br>1.9  | 71.3 ±<br>12.5       | -5.8 ±<br>2.5  |
| 6.0      | 75.9 ±<br>4.4        | 0.4 ±<br>1.3  | 75.3 ±<br>6.9        | -5.4 ±<br>0.7 | 75 ±<br>11.3         | -3.4 ±<br>2.7 | 69.2 ±<br>8.8        | -5 ±<br>1.9    | 75.2 ±<br>5.2        | -4.2 ±<br>1.5  | 71.9 ±<br>9.5        | -3.9 ±<br>1.5  | 72.4 ±<br>5          | -6.9 ±<br>2.4  | 66.1 ±<br>8          | -10.9 ±<br>2.9 |
| 7.0      | 75 ±<br>4            | -0.5 ±<br>0.2 | 78 ±<br>4.2          | -2.7 ±<br>1.4 | 76.3 ±<br>8.1        | -2.1 ±<br>1   | 71.1 ±<br>9.9        | -3 ±<br>2.7    | 74.6 ±<br>7.7        | -4.8 ±<br>2.1  | 71 ±<br>8            | -4.8 ±<br>1.7  | 74.6 ±<br>2.1        | -4.7 ±<br>2.3  | 63.6 ±<br>14.7       | -13.5 ±<br>4.3 |
| 8.0      | 70.8 ±<br>6.7        | -4.6 ±<br>4.5 | 79.1 ±<br>6.7        | -1.6 ±<br>0.3 | 74.1 ±<br>7.4        | -4.3 ±<br>1.7 | 67.2 ±<br>7.8        | -6.9 ±<br>2.8  | 69.6 ±<br>9          | -9.8 ±<br>2.7  | 71.7 ±<br>9.3        | -4.2 ±<br>1.3  | 66.7 ±<br>8.3        | -12.6 ±<br>1.9 | 65.5 ±<br>11.4       | -11.6 ±<br>2.7 |
| 9.0      | 77.5 ±<br>6.6        | 2.1 ±<br>1.8  | 79 ±<br>5.1          | -1.7 ±<br>1.1 | 72.1 ±<br>10         | -6.3 ±<br>2.4 | 67.9 ±<br>8.2        | -6.2 ±<br>1.8  | 71.5 ±<br>4.7        | -7.9 ±<br>1.3  | 71.9 ±<br>9.7        | -4 ±<br>1.6    | 78.1 ±<br>3          | -1.1 ±<br>2.3  | 64.3 ±<br>16.8       | -12.7 ±<br>5.5 |
| 10.0     | 77.1 ±<br>6.3        | 1.6 ±<br>2.1  | 77.8 ±<br>8.9        | -2.9 ±<br>2.1 | 72.4 ±<br>7.8        | -6.1 ±<br>1.8 | 68.3 ±<br>9          | -5.9 ±<br>1.8  | 73 ±<br>6.2          | -6.4 ±<br>1.7  | 69 ±<br>7.8          | -6.9 ±<br>0.5  | 69.2 ±<br>9.1        | -10.1 ±<br>3.5 | 60 ±<br>20.6         | -17.1 ±<br>6.9 |
| 11.0     | 76.6 ±<br>5          | 1.1 ±<br>1.1  | 77.7 ±<br>8.5        | -3 ±<br>3.1   | 72.2 ±<br>9.1        | -6.2 ±<br>2.3 | 66.4 ±<br>7.8        | -7.7 ±<br>3.8  | 62.8 ±<br>8.9        | -16.7 ±<br>2.6 | 68.5 ±<br>7          | -7.4 ±<br>1.6  | 66.7 ±<br>2.6        | -12.6 ±<br>4.1 | 55.1 ±<br>19.1       | -21.9 ±<br>5.8 |
| 12.0     | 75.4 ±<br>2.9        | 0 ±<br>0.7    | 72.9 ±<br>7.7        | -7.8 ±<br>1   | 74.6 ±<br>10.1       | -3.8 ±<br>2.7 | 63.9 ±<br>7.2        | -10.2 ±<br>2.8 | 67.7 ±<br>5.2        | -11.7 ±<br>2.5 | 64.3 ±<br>9.9        | -11.6 ±<br>1.9 | 62.8 ±<br>7.4        | -16.4 ±<br>7.1 | 56.8 ±<br>25.4       | -20.3 ±<br>8.9 |

TSM – total sperm motility (%; means ± SD), Δ-TSM - difference to unshaken control group (%; means ± SE), Duration (h).
